# Supplementary material
Source: PubMed Central journal article supplement (PMC4211373)

# Supplementary Figure 1

Ceramide

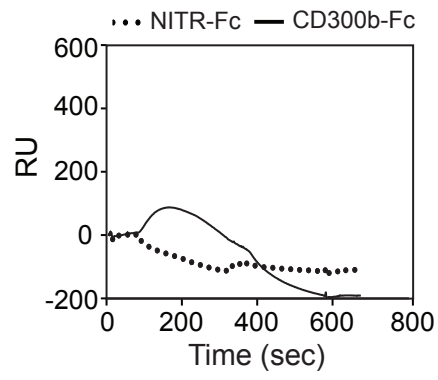

Supplement: cdd201486x1.pdf [file cdd201486x1.pdf]

# Supplementary Figure 2

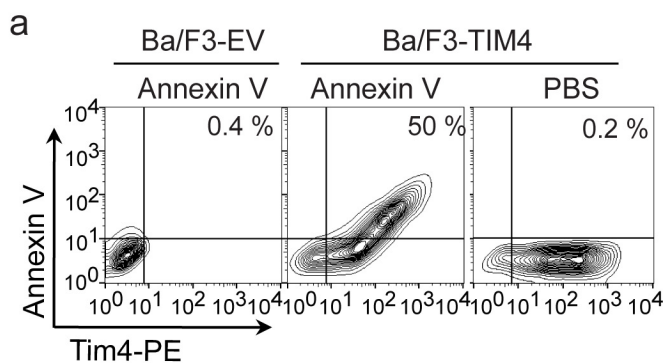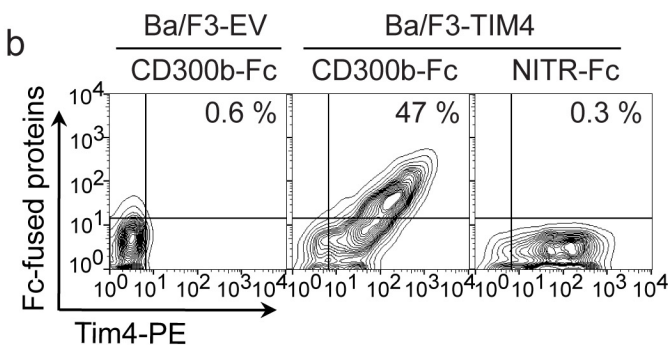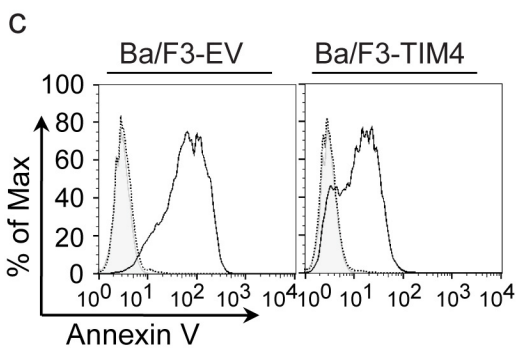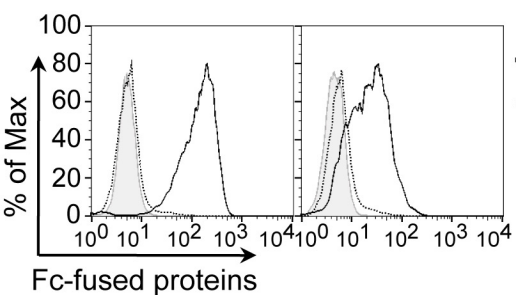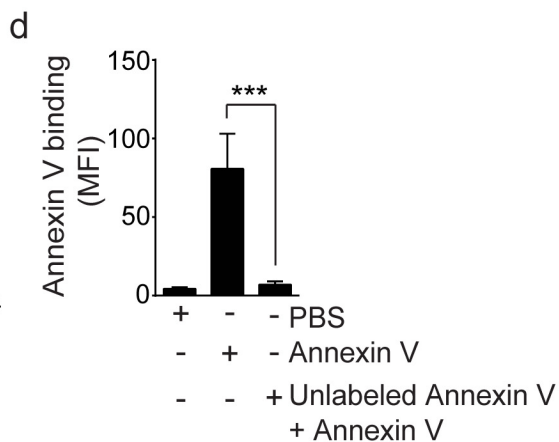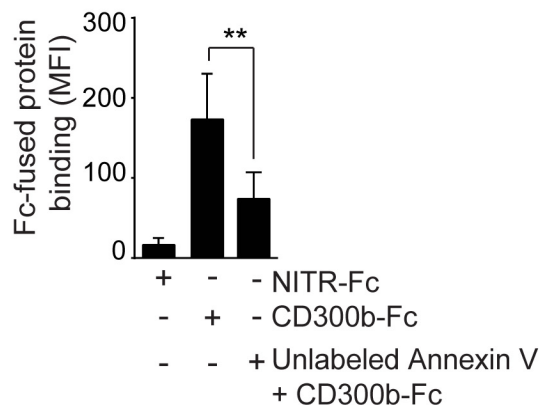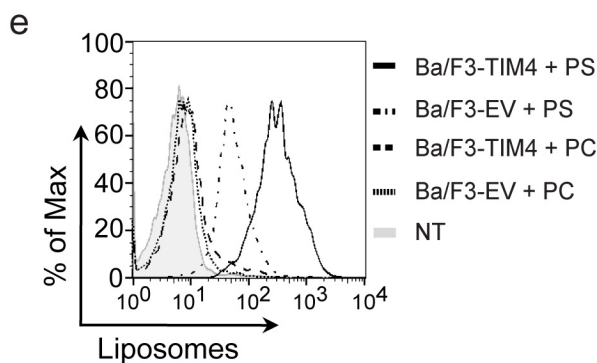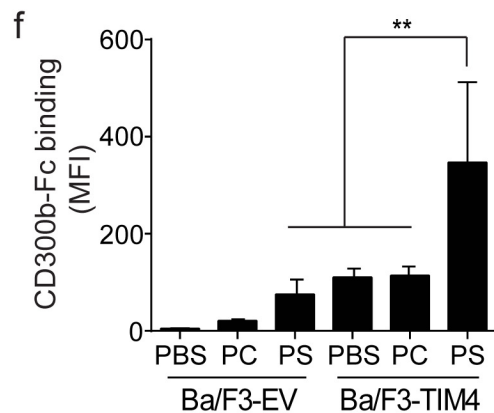

Supplement: cdd201486x2.pdf [file cdd201486x2.pdf]

Supplementary Figure 3

a

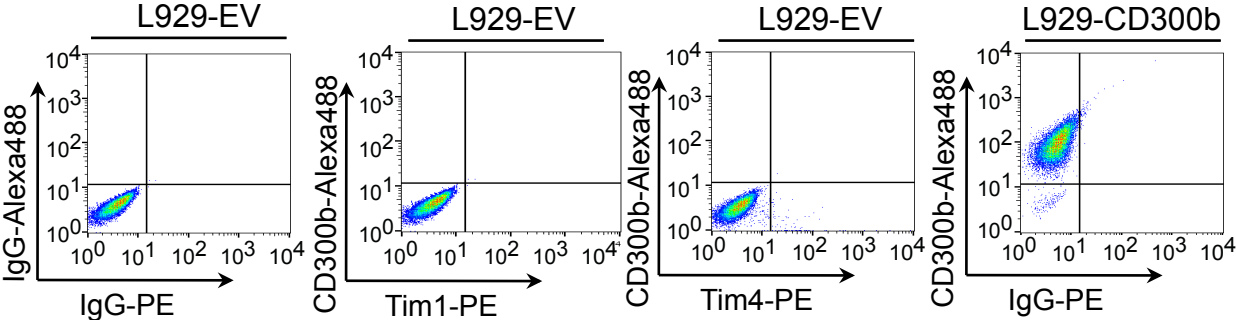

b

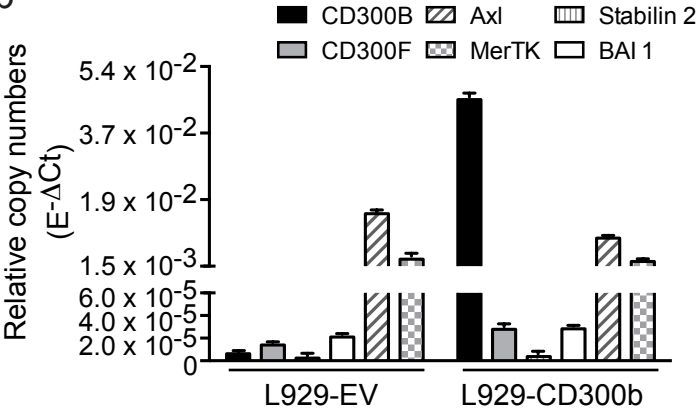

Supplement: cdd201486x3.pdf [file cdd201486x3.pdf]

Supplementary Figure 4

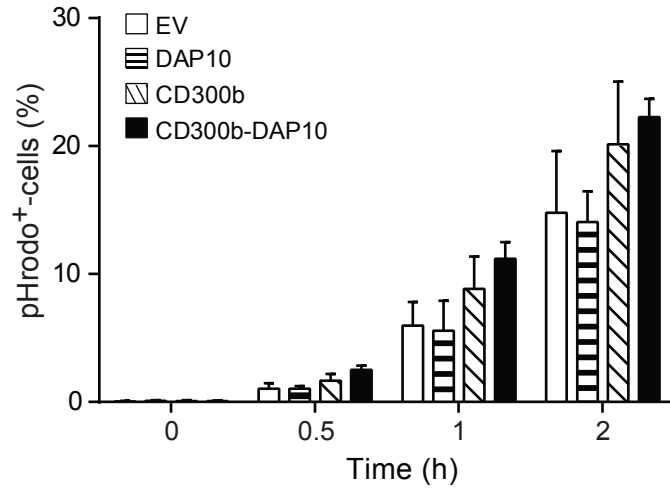

Supplement: cdd201486x4.pdf [file cdd201486x4.pdf]

# Supplementary Figure 5

a

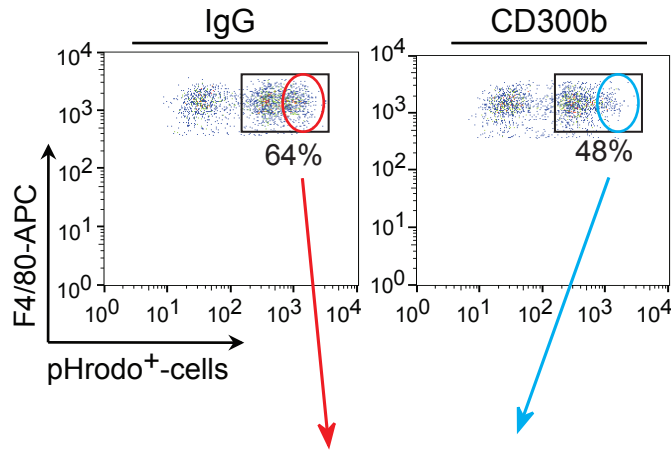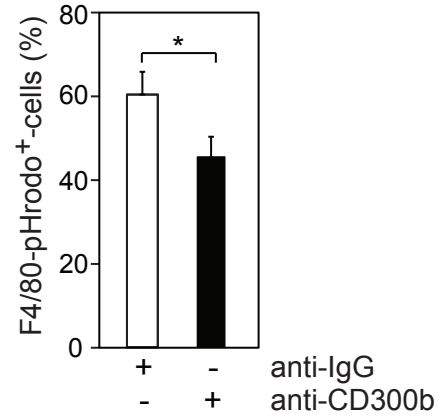

b

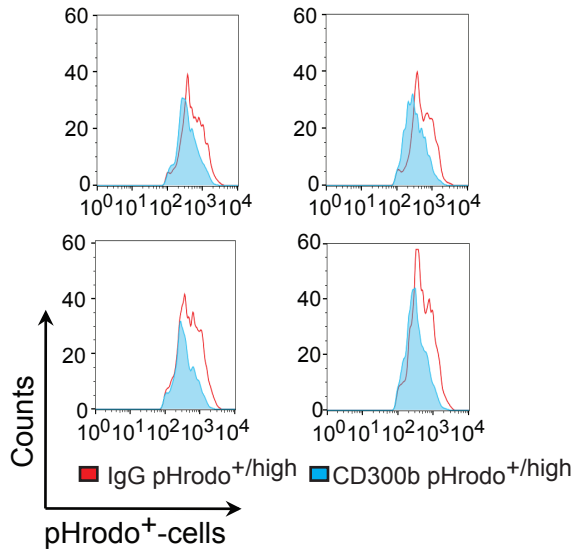

c

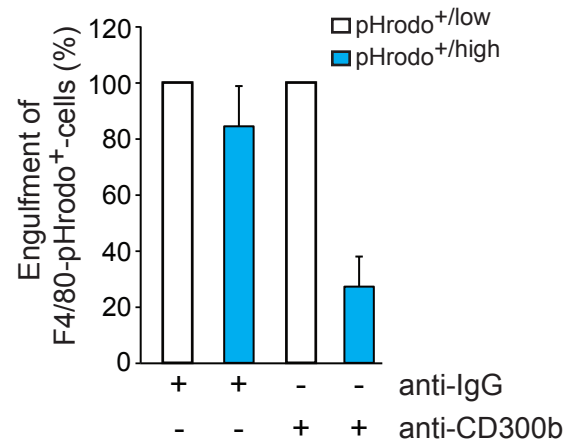

Supplement: cdd201486x5.pdf [file cdd201486x5.pdf]
